# Supplementary material for: Study on Black Phosphorus Characteristics Using a Two-Step Thinning Method
Source: MDPI journal article supplement (doi:10.3390/ma15020615), 2022-01-14
Supplement: s1 [file s1]

Article

# Study on Black Phosphorus Characteristics Using a Two-Step Thinning Method

Qin Lu <sup>1,\*</sup>, Xiaoyang Li <sup>1</sup>, Haifeng Chen <sup>1</sup>, Yifan Jia <sup>1</sup>, Tengfei Liu <sup>1</sup>, Xiangtai Liu <sup>1</sup>, Shaoqing Wang <sup>1</sup>, Jiao Fu <sup>1,\*</sup>, Daming Chen <sup>2</sup>, Jincheng Zhang <sup>3</sup> and Yue Hao <sup>3</sup>

<sup>1</sup> Key Laboratory of Advanced Semiconductor Devices and Materials, School of Electronic Engineering, Xi'an University of Posts & Telecommunications, Xi'an 710121, China; lxy974613873@sina.com (X.L.); chenhaifeng@xupt.edu.cn (H.C.); jiayifan@xupt.edu.cn (Y.J.); ltf001123@163.com (T.L.); liuxiangtai.1990@163.com (X.L.); wsqing1212@163.com (S.W.)

<sup>2</sup> Departamento de Ingeniería mecánica, Universidad de Santiago de Chile, Santiago 9160000, Chile; daming.chen@usach.cl

<sup>3</sup> Key Laboratory for Wide Band Gap Semiconductor Materials and Devices of Education, School of Microelectronics, Xidian University, Xi'an 710071, China; jchzhang@xidian.edu.cn (J.Z.); yhao@xidian.edu.cn (Y.H.)

\* Correspondence: luqin@xupt.edu.cn (Q.L.); jiao\_fu@foxmail.com (J.F.)

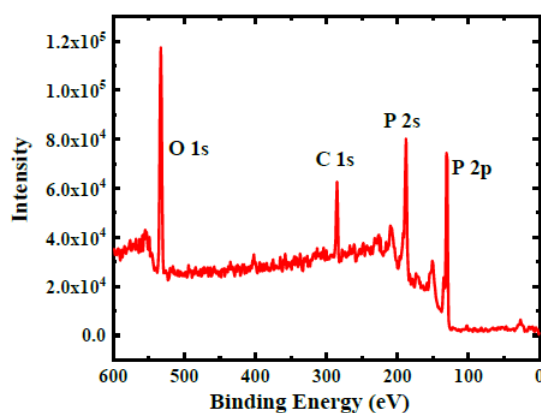

**Figure S1.** Survey XPS spectrum of BP flakes.

Figure S1 shows the survey spectrum of BP flakes including the peaks of C 1s, O 1s P 2s and P 2p.
